# Supplementary material for: Epidemiological Associations between Rabies Vaccination and Dog Owner Characteristics
Source: MDPI journal article supplement (doi:10.3390/vaccines11020352), 2023-02-03
Supplement: s1 [file s1]

## Supplementary File S1: Preliminary Questionnaire – English

### Version

Dear Participant,  
Please ensure that you select only one of the options for each of the questions.

| Question                                                                                                                | Options                                                                                                                                                                                                             |
|-------------------------------------------------------------------------------------------------------------------------|---------------------------------------------------------------------------------------------------------------------------------------------------------------------------------------------------------------------|
| 1. Do you own one or more dogs currently?<br>*Owning a dog means that you own one or more dogs where you live.          | <input type="checkbox"/> Own one or more currently<br><input type="checkbox"/> Not currently, but have owned a dog previously<br><input type="checkbox"/> Never owned a dog<br><input type="checkbox"/> Unknown     |
| 2. How many dogs do you own at the moment?                                                                              | <input type="checkbox"/> 0<br><input type="checkbox"/> 1<br><input type="checkbox"/> 2<br><input type="checkbox"/> 3<br><input type="checkbox"/> 4<br><input type="checkbox"/> 5<br><input type="checkbox"/> Over 6 |
| 3. What type of residence do you live in?                                                                               | <input type="checkbox"/> A private house<br><input type="checkbox"/> A condominium<br><input type="checkbox"/> Apartment<br><input type="checkbox"/> Other _____                                                    |
| 4. What is your highest academic level?                                                                                 | <input type="checkbox"/> Primary school <input type="checkbox"/> Junior high school <input type="checkbox"/> High school<br><input type="checkbox"/> University <input type="checkbox"/> Graduate school            |
| 5. How much is your yearly household income?<br>*Combined income before tax of all members living in the same household | <input type="checkbox"/> Less than 3 million yen<br><input type="checkbox"/> Greater than 3 million yen, but less than 10 million yen<br><input type="checkbox"/> Greater than 10 million yen                       |

## Supplementary File S2: Questionnaire – English Version

If you own more than five dogs, please answer for the five oldest.

Please select only one of the options for each question.

For the second to fourth and seventh to ninth questions, please tick the option that applies to each dog.

| Question                                                  | Options                                                                                                                                                                                                                                                                                                                                                                                                                                                                                                                                                                                                                                                                                                                                                                                                                                                                                                                                                                                                                                                                                                                                                                                                                                                                                                                                                                                                                                                                                                          |                          |                                         |                          |                                         |   |                                         |                       |                          |                          |                          |                          |                          |           |                          |                          |                          |                          |                          |                                          |                          |                          |                          |                          |                          |                    |                          |                          |                          |                          |                          |       |                          |                          |                          |                          |                          |                                                           |                          |                          |                          |                          |                          |
|-----------------------------------------------------------|------------------------------------------------------------------------------------------------------------------------------------------------------------------------------------------------------------------------------------------------------------------------------------------------------------------------------------------------------------------------------------------------------------------------------------------------------------------------------------------------------------------------------------------------------------------------------------------------------------------------------------------------------------------------------------------------------------------------------------------------------------------------------------------------------------------------------------------------------------------------------------------------------------------------------------------------------------------------------------------------------------------------------------------------------------------------------------------------------------------------------------------------------------------------------------------------------------------------------------------------------------------------------------------------------------------------------------------------------------------------------------------------------------------------------------------------------------------------------------------------------------------|--------------------------|-----------------------------------------|--------------------------|-----------------------------------------|---|-----------------------------------------|-----------------------|--------------------------|--------------------------|--------------------------|--------------------------|--------------------------|-----------|--------------------------|--------------------------|--------------------------|--------------------------|--------------------------|------------------------------------------|--------------------------|--------------------------|--------------------------|--------------------------|--------------------------|--------------------|--------------------------|--------------------------|--------------------------|--------------------------|--------------------------|-------|--------------------------|--------------------------|--------------------------|--------------------------|--------------------------|-----------------------------------------------------------|--------------------------|--------------------------|--------------------------|--------------------------|--------------------------|
| 1. How many dogs do you currently own?                    | <input type="checkbox"/> 0<br><input type="checkbox"/> 1<br><input type="checkbox"/> 2<br><input type="checkbox"/> 3<br><input type="checkbox"/> 4<br><input type="checkbox"/> 5<br><input type="checkbox"/> Over 6                                                                                                                                                                                                                                                                                                                                                                                                                                                                                                                                                                                                                                                                                                                                                                                                                                                                                                                                                                                                                                                                                                                                                                                                                                                                                              |                          |                                         |                          |                                         |   |                                         |                       |                          |                          |                          |                          |                          |           |                          |                          |                          |                          |                          |                                          |                          |                          |                          |                          |                          |                    |                          |                          |                          |                          |                          |       |                          |                          |                          |                          |                          |                                                           |                          |                          |                          |                          |                          |
| 2. How did you obtain your dog?                           | <table border="1"> <thead> <tr> <th></th><th>1<br/>(1<sup>st</sup><br/>oldest<br/>dog)</th><th>2</th><th>3</th><th>4</th><th>5<br/>(5<sup>th</sup><br/>oldest<br/>dog)</th></tr> </thead> <tbody> <tr> <td>Bought</td><td><input type="checkbox"/></td><td><input type="checkbox"/></td><td><input type="checkbox"/></td><td><input type="checkbox"/></td><td><input type="checkbox"/></td></tr> <tr> <td>Was given</td><td><input type="checkbox"/></td><td><input type="checkbox"/></td><td><input type="checkbox"/></td><td><input type="checkbox"/></td><td><input type="checkbox"/></td></tr> <tr> <td>Offspring of a dog that I already owned.</td><td><input type="checkbox"/></td><td><input type="checkbox"/></td><td><input type="checkbox"/></td><td><input type="checkbox"/></td><td><input type="checkbox"/></td></tr> <tr> <td>Took in as a stray</td><td><input type="checkbox"/></td><td><input type="checkbox"/></td><td><input type="checkbox"/></td><td><input type="checkbox"/></td><td><input type="checkbox"/></td></tr> <tr> <td>Other</td><td><input type="checkbox"/></td><td><input type="checkbox"/></td><td><input type="checkbox"/></td><td><input type="checkbox"/></td><td><input type="checkbox"/></td></tr> <tr> <td>Not applicable (e.g. because I don't have 2 or more dogs)</td><td><input type="checkbox"/></td><td><input type="checkbox"/></td><td><input type="checkbox"/></td><td><input type="checkbox"/></td><td><input type="checkbox"/></td></tr> </tbody> </table> |                          | 1<br>(1 <sup>st</sup><br>oldest<br>dog) | 2                        | 3                                       | 4 | 5<br>(5 <sup>th</sup><br>oldest<br>dog) | Bought                | <input type="checkbox"/> | Was given | <input type="checkbox"/> | Offspring of a dog that I already owned. | <input type="checkbox"/> | Took in as a stray | <input type="checkbox"/> | Other | <input type="checkbox"/> | Not applicable (e.g. because I don't have 2 or more dogs) | <input type="checkbox"/> |
|                                                           | 1<br>(1 <sup>st</sup><br>oldest<br>dog)                                                                                                                                                                                                                                                                                                                                                                                                                                                                                                                                                                                                                                                                                                                                                                                                                                                                                                                                                                                                                                                                                                                                                                                                                                                                                                                                                                                                                                                                          | 2                        | 3                                       | 4                        | 5<br>(5 <sup>th</sup><br>oldest<br>dog) |   |                                         |                       |                          |                          |                          |                          |                          |           |                          |                          |                          |                          |                          |                                          |                          |                          |                          |                          |                          |                    |                          |                          |                          |                          |                          |       |                          |                          |                          |                          |                          |                                                           |                          |                          |                          |                          |                          |
| Bought                                                    | <input type="checkbox"/>                                                                                                                                                                                                                                                                                                                                                                                                                                                                                                                                                                                                                                                                                                                                                                                                                                                                                                                                                                                                                                                                                                                                                                                                                                                                                                                                                                                                                                                                                         | <input type="checkbox"/> | <input type="checkbox"/>                | <input type="checkbox"/> | <input type="checkbox"/>                |   |                                         |                       |                          |                          |                          |                          |                          |           |                          |                          |                          |                          |                          |                                          |                          |                          |                          |                          |                          |                    |                          |                          |                          |                          |                          |       |                          |                          |                          |                          |                          |                                                           |                          |                          |                          |                          |                          |
| Was given                                                 | <input type="checkbox"/>                                                                                                                                                                                                                                                                                                                                                                                                                                                                                                                                                                                                                                                                                                                                                                                                                                                                                                                                                                                                                                                                                                                                                                                                                                                                                                                                                                                                                                                                                         | <input type="checkbox"/> | <input type="checkbox"/>                | <input type="checkbox"/> | <input type="checkbox"/>                |   |                                         |                       |                          |                          |                          |                          |                          |           |                          |                          |                          |                          |                          |                                          |                          |                          |                          |                          |                          |                    |                          |                          |                          |                          |                          |       |                          |                          |                          |                          |                          |                                                           |                          |                          |                          |                          |                          |
| Offspring of a dog that I already owned.                  | <input type="checkbox"/>                                                                                                                                                                                                                                                                                                                                                                                                                                                                                                                                                                                                                                                                                                                                                                                                                                                                                                                                                                                                                                                                                                                                                                                                                                                                                                                                                                                                                                                                                         | <input type="checkbox"/> | <input type="checkbox"/>                | <input type="checkbox"/> | <input type="checkbox"/>                |   |                                         |                       |                          |                          |                          |                          |                          |           |                          |                          |                          |                          |                          |                                          |                          |                          |                          |                          |                          |                    |                          |                          |                          |                          |                          |       |                          |                          |                          |                          |                          |                                                           |                          |                          |                          |                          |                          |
| Took in as a stray                                        | <input type="checkbox"/>                                                                                                                                                                                                                                                                                                                                                                                                                                                                                                                                                                                                                                                                                                                                                                                                                                                                                                                                                                                                                                                                                                                                                                                                                                                                                                                                                                                                                                                                                         | <input type="checkbox"/> | <input type="checkbox"/>                | <input type="checkbox"/> | <input type="checkbox"/>                |   |                                         |                       |                          |                          |                          |                          |                          |           |                          |                          |                          |                          |                          |                                          |                          |                          |                          |                          |                          |                    |                          |                          |                          |                          |                          |       |                          |                          |                          |                          |                          |                                                           |                          |                          |                          |                          |                          |
| Other                                                     | <input type="checkbox"/>                                                                                                                                                                                                                                                                                                                                                                                                                                                                                                                                                                                                                                                                                                                                                                                                                                                                                                                                                                                                                                                                                                                                                                                                                                                                                                                                                                                                                                                                                         | <input type="checkbox"/> | <input type="checkbox"/>                | <input type="checkbox"/> | <input type="checkbox"/>                |   |                                         |                       |                          |                          |                          |                          |                          |           |                          |                          |                          |                          |                          |                                          |                          |                          |                          |                          |                          |                    |                          |                          |                          |                          |                          |       |                          |                          |                          |                          |                          |                                                           |                          |                          |                          |                          |                          |
| Not applicable (e.g. because I don't have 2 or more dogs) | <input type="checkbox"/>                                                                                                                                                                                                                                                                                                                                                                                                                                                                                                                                                                                                                                                                                                                                                                                                                                                                                                                                                                                                                                                                                                                                                                                                                                                                                                                                                                                                                                                                                         | <input type="checkbox"/> | <input type="checkbox"/>                | <input type="checkbox"/> | <input type="checkbox"/>                |   |                                         |                       |                          |                          |                          |                          |                          |           |                          |                          |                          |                          |                          |                                          |                          |                          |                          |                          |                          |                    |                          |                          |                          |                          |                          |       |                          |                          |                          |                          |                          |                                                           |                          |                          |                          |                          |                          |
| 3. Is your dog local or exotic?                           | <table border="1"> <thead> <tr> <th></th><th>1<br/>(1<sup>st</sup><br/>oldest<br/>dog)</th><th>2</th><th>3</th><th>4</th><th>5<br/>(5<sup>th</sup><br/>oldest<br/>dog)</th></tr> </thead> <tbody> <tr> <td>Local (with pedigree)</td><td><input type="checkbox"/></td><td><input type="checkbox"/></td><td><input type="checkbox"/></td><td><input type="checkbox"/></td><td><input type="checkbox"/></td></tr> </tbody> </table>                                                                                                                                                                                                                                                                                                                                                                                                                                                                                                                                                                                                                                                                                                                                                                                                                                                                                                                                                                                                                                                                                |                          | 1<br>(1 <sup>st</sup><br>oldest<br>dog) | 2                        | 3                                       | 4 | 5<br>(5 <sup>th</sup><br>oldest<br>dog) | Local (with pedigree) | <input type="checkbox"/> |           |                          |                          |                          |                          |                          |                                          |                          |                          |                          |                          |                          |                    |                          |                          |                          |                          |                          |       |                          |                          |                          |                          |                          |                                                           |                          |                          |                          |                          |                          |
|                                                           | 1<br>(1 <sup>st</sup><br>oldest<br>dog)                                                                                                                                                                                                                                                                                                                                                                                                                                                                                                                                                                                                                                                                                                                                                                                                                                                                                                                                                                                                                                                                                                                                                                                                                                                                                                                                                                                                                                                                          | 2                        | 3                                       | 4                        | 5<br>(5 <sup>th</sup><br>oldest<br>dog) |   |                                         |                       |                          |                          |                          |                          |                          |           |                          |                          |                          |                          |                          |                                          |                          |                          |                          |                          |                          |                    |                          |                          |                          |                          |                          |       |                          |                          |                          |                          |                          |                                                           |                          |                          |                          |                          |                          |
| Local (with pedigree)                                     | <input type="checkbox"/>                                                                                                                                                                                                                                                                                                                                                                                                                                                                                                                                                                                                                                                                                                                                                                                                                                                                                                                                                                                                                                                                                                                                                                                                                                                                                                                                                                                                                                                                                         | <input type="checkbox"/> | <input type="checkbox"/>                | <input type="checkbox"/> | <input type="checkbox"/>                |   |                                         |                       |                          |                          |                          |                          |                          |           |                          |                          |                          |                          |                          |                                          |                          |                          |                          |                          |                          |                    |                          |                          |                          |                          |                          |       |                          |                          |                          |                          |                          |                                                           |                          |                          |                          |                          |                          |

|                                                                           |                                                                                                                                                                                                                                                                                                                                                                                                                                                                                                                                                                                                                                                                                                                                                                                                                                                                                                                                                                                                                                     |                          |                          |                          |                                   |                          |  |                                   |   |   |   |                                   |         |                          |                          |                          |                          |                          |                       |                          |                          |                          |                          |                          |                     |                          |                          |                          |                          |                          |                   |                          |                          |                          |                          |                          |
|---------------------------------------------------------------------------|-------------------------------------------------------------------------------------------------------------------------------------------------------------------------------------------------------------------------------------------------------------------------------------------------------------------------------------------------------------------------------------------------------------------------------------------------------------------------------------------------------------------------------------------------------------------------------------------------------------------------------------------------------------------------------------------------------------------------------------------------------------------------------------------------------------------------------------------------------------------------------------------------------------------------------------------------------------------------------------------------------------------------------------|--------------------------|--------------------------|--------------------------|-----------------------------------|--------------------------|--|-----------------------------------|---|---|---|-----------------------------------|---------|--------------------------|--------------------------|--------------------------|--------------------------|--------------------------|-----------------------|--------------------------|--------------------------|--------------------------|--------------------------|--------------------------|---------------------|--------------------------|--------------------------|--------------------------|--------------------------|--------------------------|-------------------|--------------------------|--------------------------|--------------------------|--------------------------|--------------------------|
|                                                                           | Exotic (with pedigree)                                                                                                                                                                                                                                                                                                                                                                                                                                                                                                                                                                                                                                                                                                                                                                                                                                                                                                                                                                                                              | <input type="checkbox"/> | <input type="checkbox"/> | <input type="checkbox"/> | <input type="checkbox"/>          | <input type="checkbox"/> |  |                                   |   |   |   |                                   |         |                          |                          |                          |                          |                          |                       |                          |                          |                          |                          |                          |                     |                          |                          |                          |                          |                          |                   |                          |                          |                          |                          |                          |
|                                                                           | Local (no pedigree)                                                                                                                                                                                                                                                                                                                                                                                                                                                                                                                                                                                                                                                                                                                                                                                                                                                                                                                                                                                                                 | <input type="checkbox"/> | <input type="checkbox"/> | <input type="checkbox"/> | <input type="checkbox"/>          | <input type="checkbox"/> |  |                                   |   |   |   |                                   |         |                          |                          |                          |                          |                          |                       |                          |                          |                          |                          |                          |                     |                          |                          |                          |                          |                          |                   |                          |                          |                          |                          |                          |
|                                                                           | Exotic (no pedigree)                                                                                                                                                                                                                                                                                                                                                                                                                                                                                                                                                                                                                                                                                                                                                                                                                                                                                                                                                                                                                | <input type="checkbox"/> | <input type="checkbox"/> | <input type="checkbox"/> | <input type="checkbox"/>          | <input type="checkbox"/> |  |                                   |   |   |   |                                   |         |                          |                          |                          |                          |                          |                       |                          |                          |                          |                          |                          |                     |                          |                          |                          |                          |                          |                   |                          |                          |                          |                          |                          |
|                                                                           | Hybrid                                                                                                                                                                                                                                                                                                                                                                                                                                                                                                                                                                                                                                                                                                                                                                                                                                                                                                                                                                                                                              | <input type="checkbox"/> | <input type="checkbox"/> | <input type="checkbox"/> | <input type="checkbox"/>          | <input type="checkbox"/> |  |                                   |   |   |   |                                   |         |                          |                          |                          |                          |                          |                       |                          |                          |                          |                          |                          |                     |                          |                          |                          |                          |                          |                   |                          |                          |                          |                          |                          |
|                                                                           | Unknown                                                                                                                                                                                                                                                                                                                                                                                                                                                                                                                                                                                                                                                                                                                                                                                                                                                                                                                                                                                                                             | <input type="checkbox"/> | <input type="checkbox"/> | <input type="checkbox"/> | <input type="checkbox"/>          | <input type="checkbox"/> |  |                                   |   |   |   |                                   |         |                          |                          |                          |                          |                          |                       |                          |                          |                          |                          |                          |                     |                          |                          |                          |                          |                          |                   |                          |                          |                          |                          |                          |
| 4. Where do you keep your dog?                                            | <table border="1"> <tr> <td></td> <td>1<br/>(1<sup>st</sup> oldest dog)</td> <td>2</td> <td>3</td> <td>4</td> <td>5<br/>(5<sup>th</sup> oldest dog)</td> </tr> <tr> <td>Indoors</td> <td><input type="checkbox"/></td> <td><input type="checkbox"/></td> <td><input type="checkbox"/></td> <td><input type="checkbox"/></td> <td><input type="checkbox"/></td> </tr> <tr> <td>Outdoors (On a leash)</td> <td><input type="checkbox"/></td> <td><input type="checkbox"/></td> <td><input type="checkbox"/></td> <td><input type="checkbox"/></td> <td><input type="checkbox"/></td> </tr> <tr> <td>Outdoors (No leash)</td> <td><input type="checkbox"/></td> <td><input type="checkbox"/></td> <td><input type="checkbox"/></td> <td><input type="checkbox"/></td> <td><input type="checkbox"/></td> </tr> <tr> <td>No applicable dog</td> <td><input type="checkbox"/></td> <td><input type="checkbox"/></td> <td><input type="checkbox"/></td> <td><input type="checkbox"/></td> <td><input type="checkbox"/></td> </tr> </table> |                          |                          |                          |                                   |                          |  | 1<br>(1 <sup>st</sup> oldest dog) | 2 | 3 | 4 | 5<br>(5 <sup>th</sup> oldest dog) | Indoors | <input type="checkbox"/> | Outdoors (On a leash) | <input type="checkbox"/> | Outdoors (No leash) | <input type="checkbox"/> | No applicable dog | <input type="checkbox"/> |
|                                                                           | 1<br>(1 <sup>st</sup> oldest dog)                                                                                                                                                                                                                                                                                                                                                                                                                                                                                                                                                                                                                                                                                                                                                                                                                                                                                                                                                                                                   | 2                        | 3                        | 4                        | 5<br>(5 <sup>th</sup> oldest dog) |                          |  |                                   |   |   |   |                                   |         |                          |                          |                          |                          |                          |                       |                          |                          |                          |                          |                          |                     |                          |                          |                          |                          |                          |                   |                          |                          |                          |                          |                          |
| Indoors                                                                   | <input type="checkbox"/>                                                                                                                                                                                                                                                                                                                                                                                                                                                                                                                                                                                                                                                                                                                                                                                                                                                                                                                                                                                                            | <input type="checkbox"/> | <input type="checkbox"/> | <input type="checkbox"/> | <input type="checkbox"/>          |                          |  |                                   |   |   |   |                                   |         |                          |                          |                          |                          |                          |                       |                          |                          |                          |                          |                          |                     |                          |                          |                          |                          |                          |                   |                          |                          |                          |                          |                          |
| Outdoors (On a leash)                                                     | <input type="checkbox"/>                                                                                                                                                                                                                                                                                                                                                                                                                                                                                                                                                                                                                                                                                                                                                                                                                                                                                                                                                                                                            | <input type="checkbox"/> | <input type="checkbox"/> | <input type="checkbox"/> | <input type="checkbox"/>          |                          |  |                                   |   |   |   |                                   |         |                          |                          |                          |                          |                          |                       |                          |                          |                          |                          |                          |                     |                          |                          |                          |                          |                          |                   |                          |                          |                          |                          |                          |
| Outdoors (No leash)                                                       | <input type="checkbox"/>                                                                                                                                                                                                                                                                                                                                                                                                                                                                                                                                                                                                                                                                                                                                                                                                                                                                                                                                                                                                            | <input type="checkbox"/> | <input type="checkbox"/> | <input type="checkbox"/> | <input type="checkbox"/>          |                          |  |                                   |   |   |   |                                   |         |                          |                          |                          |                          |                          |                       |                          |                          |                          |                          |                          |                     |                          |                          |                          |                          |                          |                   |                          |                          |                          |                          |                          |
| No applicable dog                                                         | <input type="checkbox"/>                                                                                                                                                                                                                                                                                                                                                                                                                                                                                                                                                                                                                                                                                                                                                                                                                                                                                                                                                                                                            | <input type="checkbox"/> | <input type="checkbox"/> | <input type="checkbox"/> | <input type="checkbox"/>          |                          |  |                                   |   |   |   |                                   |         |                          |                          |                          |                          |                          |                       |                          |                          |                          |                          |                          |                     |                          |                          |                          |                          |                          |                   |                          |                          |                          |                          |                          |
| 5. How old was your dog when you first obtained it?                       | 1: _____<br>2: _____<br>3: _____<br>4: _____<br>5: _____                                                                                                                                                                                                                                                                                                                                                                                                                                                                                                                                                                                                                                                                                                                                                                                                                                                                                                                                                                            |                          |                          |                          |                                   |                          |  |                                   |   |   |   |                                   |         |                          |                          |                          |                          |                          |                       |                          |                          |                          |                          |                          |                     |                          |                          |                          |                          |                          |                   |                          |                          |                          |                          |                          |
| 6. How old is your dog now?                                               | 1: _____<br>2: _____<br>3: _____<br>4: _____<br>5: _____                                                                                                                                                                                                                                                                                                                                                                                                                                                                                                                                                                                                                                                                                                                                                                                                                                                                                                                                                                            |                          |                          |                          |                                   |                          |  |                                   |   |   |   |                                   |         |                          |                          |                          |                          |                          |                       |                          |                          |                          |                          |                          |                     |                          |                          |                          |                          |                          |                   |                          |                          |                          |                          |                          |
| 7. Please check all ages at which your dog was vaccinated against rabies. | <table border="1"> <tr> <td></td> <td>1<br/>(1<sup>st</sup>)</td> <td>2</td> <td>3</td> <td>4</td> <td>5<br/>(5<sup>th</sup>)</td> </tr> </table>                                                                                                                                                                                                                                                                                                                                                                                                                                                                                                                                                                                                                                                                                                                                                                                                                                                                                   |                          |                          |                          |                                   |                          |  | 1<br>(1 <sup>st</sup> )           | 2 | 3 | 4 | 5<br>(5 <sup>th</sup> )           |         |                          |                          |                          |                          |                          |                       |                          |                          |                          |                          |                          |                     |                          |                          |                          |                          |                          |                   |                          |                          |                          |                          |                          |
|                                                                           | 1<br>(1 <sup>st</sup> )                                                                                                                                                                                                                                                                                                                                                                                                                                                                                                                                                                                                                                                                                                                                                                                                                                                                                                                                                                                                             | 2                        | 3                        | 4                        | 5<br>(5 <sup>th</sup> )           |                          |  |                                   |   |   |   |                                   |         |                          |                          |                          |                          |                          |                       |                          |                          |                          |                          |                          |                     |                          |                          |                          |                          |                          |                   |                          |                          |                          |                          |                          |

|  |            |                          |                          |                          |                          |                          |  |
|--|------------|--------------------------|--------------------------|--------------------------|--------------------------|--------------------------|--|
|  |            | oldest<br>dog)           |                          |                          |                          | oldest<br>dog)           |  |
|  | 1 year old | <input type="checkbox"/> |  |
|  | 2          | <input type="checkbox"/> |  |
|  | 3          | <input type="checkbox"/> |  |
|  | 4          | <input type="checkbox"/> |  |
|  | 5          | <input type="checkbox"/> |  |
|  | 6          | <input type="checkbox"/> |  |
|  | 7          | <input type="checkbox"/> |  |
|  | 8          | <input type="checkbox"/> |  |
|  | 9          | <input type="checkbox"/> |  |
|  | 10         | <input type="checkbox"/> |  |
|  | 11         | <input type="checkbox"/> |  |
|  | 12         | <input type="checkbox"/> |  |
|  | 13         | <input type="checkbox"/> |  |
|  | 14         | <input type="checkbox"/> |  |
|  | 15         | <input type="checkbox"/> |  |
|  | 16         | <input type="checkbox"/> |  |
|  | 17         | <input type="checkbox"/> |  |
|  | 18         | <input type="checkbox"/> |  |
|  | 19         | <input type="checkbox"/> |  |
|  | 20         | <input type="checkbox"/> |  |
|  | 21         | <input type="checkbox"/> |  |
|  | 22         | <input type="checkbox"/> |  |
|  | 23         | <input type="checkbox"/> |  |
|  | 24         | <input type="checkbox"/> |  |
|  | 25         | <input type="checkbox"/> |  |
|  | Never      | <input type="checkbox"/> |  |

|                                                                                                                                    |                                                                                                                                                                                                                                                                                                                                                                                                                                                                                                                                                                                                                                                                                                                                                                                                                                                                                                                                                                                                                                                                                                                                                                                                                                                                        |                          |                                   |                          |                                   |                          |                                   |                                                     |                          |                          |                          |                          |                          |                         |                          |                          |                          |                          |                          |                   |                          |                          |                          |                          |                          |                              |                          |                          |                          |                          |                          |                   |                          |                          |                          |                          |                          |  |  |  |  |  |
|------------------------------------------------------------------------------------------------------------------------------------|------------------------------------------------------------------------------------------------------------------------------------------------------------------------------------------------------------------------------------------------------------------------------------------------------------------------------------------------------------------------------------------------------------------------------------------------------------------------------------------------------------------------------------------------------------------------------------------------------------------------------------------------------------------------------------------------------------------------------------------------------------------------------------------------------------------------------------------------------------------------------------------------------------------------------------------------------------------------------------------------------------------------------------------------------------------------------------------------------------------------------------------------------------------------------------------------------------------------------------------------------------------------|--------------------------|-----------------------------------|--------------------------|-----------------------------------|--------------------------|-----------------------------------|-----------------------------------------------------|--------------------------|--------------------------|--------------------------|--------------------------|--------------------------|-------------------------|--------------------------|--------------------------|--------------------------|--------------------------|--------------------------|-------------------|--------------------------|--------------------------|--------------------------|--------------------------|--------------------------|------------------------------|--------------------------|--------------------------|--------------------------|--------------------------|--------------------------|-------------------|--------------------------|--------------------------|--------------------------|--------------------------|--------------------------|--|--|--|--|--|
|                                                                                                                                    | No applicable dog                                                                                                                                                                                                                                                                                                                                                                                                                                                                                                                                                                                                                                                                                                                                                                                                                                                                                                                                                                                                                                                                                                                                                                                                                                                      | <input type="checkbox"/> | <input type="checkbox"/>          | <input type="checkbox"/> | <input type="checkbox"/>          | <input type="checkbox"/> |                                   |                                                     |                          |                          |                          |                          |                          |                         |                          |                          |                          |                          |                          |                   |                          |                          |                          |                          |                          |                              |                          |                          |                          |                          |                          |                   |                          |                          |                          |                          |                          |  |  |  |  |  |
| 8. Did you register your dog?                                                                                                      | <table border="1"> <tr> <td></td><td>1<br/>(1<sup>st</sup> oldest dog)</td><td>2</td><td>3</td><td>4</td><td>5<br/>(5<sup>th</sup> oldest dog)</td></tr> <tr> <td>Registered at the same time as a rabies vaccination</td><td><input type="checkbox"/></td><td><input type="checkbox"/></td><td><input type="checkbox"/></td><td><input type="checkbox"/></td><td><input type="checkbox"/></td></tr> <tr> <td>Only rabies vaccination</td><td><input type="checkbox"/></td><td><input type="checkbox"/></td><td><input type="checkbox"/></td><td><input type="checkbox"/></td><td><input type="checkbox"/></td></tr> <tr> <td>Only registration</td><td><input type="checkbox"/></td><td><input type="checkbox"/></td><td><input type="checkbox"/></td><td><input type="checkbox"/></td><td><input type="checkbox"/></td></tr> <tr> <td>Not vaccinated or registered</td><td><input type="checkbox"/></td><td><input type="checkbox"/></td><td><input type="checkbox"/></td><td><input type="checkbox"/></td><td><input type="checkbox"/></td></tr> <tr> <td>No applicable dog</td><td><input type="checkbox"/></td><td><input type="checkbox"/></td><td><input type="checkbox"/></td><td><input type="checkbox"/></td><td><input type="checkbox"/></td></tr> </table> |                          | 1<br>(1 <sup>st</sup> oldest dog) | 2                        | 3                                 | 4                        | 5<br>(5 <sup>th</sup> oldest dog) | Registered at the same time as a rabies vaccination | <input type="checkbox"/> | Only rabies vaccination | <input type="checkbox"/> | Only registration | <input type="checkbox"/> | Not vaccinated or registered | <input type="checkbox"/> | No applicable dog | <input type="checkbox"/> |  |  |  |  |  |
|                                                                                                                                    | 1<br>(1 <sup>st</sup> oldest dog)                                                                                                                                                                                                                                                                                                                                                                                                                                                                                                                                                                                                                                                                                                                                                                                                                                                                                                                                                                                                                                                                                                                                                                                                                                      | 2                        | 3                                 | 4                        | 5<br>(5 <sup>th</sup> oldest dog) |                          |                                   |                                                     |                          |                          |                          |                          |                          |                         |                          |                          |                          |                          |                          |                   |                          |                          |                          |                          |                          |                              |                          |                          |                          |                          |                          |                   |                          |                          |                          |                          |                          |  |  |  |  |  |
| Registered at the same time as a rabies vaccination                                                                                | <input type="checkbox"/>                                                                                                                                                                                                                                                                                                                                                                                                                                                                                                                                                                                                                                                                                                                                                                                                                                                                                                                                                                                                                                                                                                                                                                                                                                               | <input type="checkbox"/> | <input type="checkbox"/>          | <input type="checkbox"/> | <input type="checkbox"/>          |                          |                                   |                                                     |                          |                          |                          |                          |                          |                         |                          |                          |                          |                          |                          |                   |                          |                          |                          |                          |                          |                              |                          |                          |                          |                          |                          |                   |                          |                          |                          |                          |                          |  |  |  |  |  |
| Only rabies vaccination                                                                                                            | <input type="checkbox"/>                                                                                                                                                                                                                                                                                                                                                                                                                                                                                                                                                                                                                                                                                                                                                                                                                                                                                                                                                                                                                                                                                                                                                                                                                                               | <input type="checkbox"/> | <input type="checkbox"/>          | <input type="checkbox"/> | <input type="checkbox"/>          |                          |                                   |                                                     |                          |                          |                          |                          |                          |                         |                          |                          |                          |                          |                          |                   |                          |                          |                          |                          |                          |                              |                          |                          |                          |                          |                          |                   |                          |                          |                          |                          |                          |  |  |  |  |  |
| Only registration                                                                                                                  | <input type="checkbox"/>                                                                                                                                                                                                                                                                                                                                                                                                                                                                                                                                                                                                                                                                                                                                                                                                                                                                                                                                                                                                                                                                                                                                                                                                                                               | <input type="checkbox"/> | <input type="checkbox"/>          | <input type="checkbox"/> | <input type="checkbox"/>          |                          |                                   |                                                     |                          |                          |                          |                          |                          |                         |                          |                          |                          |                          |                          |                   |                          |                          |                          |                          |                          |                              |                          |                          |                          |                          |                          |                   |                          |                          |                          |                          |                          |  |  |  |  |  |
| Not vaccinated or registered                                                                                                       | <input type="checkbox"/>                                                                                                                                                                                                                                                                                                                                                                                                                                                                                                                                                                                                                                                                                                                                                                                                                                                                                                                                                                                                                                                                                                                                                                                                                                               | <input type="checkbox"/> | <input type="checkbox"/>          | <input type="checkbox"/> | <input type="checkbox"/>          |                          |                                   |                                                     |                          |                          |                          |                          |                          |                         |                          |                          |                          |                          |                          |                   |                          |                          |                          |                          |                          |                              |                          |                          |                          |                          |                          |                   |                          |                          |                          |                          |                          |  |  |  |  |  |
| No applicable dog                                                                                                                  | <input type="checkbox"/>                                                                                                                                                                                                                                                                                                                                                                                                                                                                                                                                                                                                                                                                                                                                                                                                                                                                                                                                                                                                                                                                                                                                                                                                                                               | <input type="checkbox"/> | <input type="checkbox"/>          | <input type="checkbox"/> | <input type="checkbox"/>          |                          |                                   |                                                     |                          |                          |                          |                          |                          |                         |                          |                          |                          |                          |                          |                   |                          |                          |                          |                          |                          |                              |                          |                          |                          |                          |                          |                   |                          |                          |                          |                          |                          |  |  |  |  |  |
| 9. Have you ever vaccinated your dog for a disease other than rabies?                                                              | <table border="1"> <tr> <td></td><td>1<br/>(1<sup>st</sup> oldest dog)</td><td>2</td><td>3</td><td>4</td><td>5<br/>(5<sup>th</sup> oldest dog)</td></tr> <tr> <td>Yes</td><td><input type="checkbox"/></td><td><input type="checkbox"/></td><td><input type="checkbox"/></td><td><input type="checkbox"/></td><td><input type="checkbox"/></td></tr> <tr> <td>No</td><td><input type="checkbox"/></td><td><input type="checkbox"/></td><td><input type="checkbox"/></td><td><input type="checkbox"/></td><td><input type="checkbox"/></td></tr> <tr> <td>No applicable dog</td><td><input type="checkbox"/></td><td><input type="checkbox"/></td><td><input type="checkbox"/></td><td><input type="checkbox"/></td><td><input type="checkbox"/></td></tr> </table>                                                                                                                                                                                                                                                                                                                                                                                                                                                                                                     |                          | 1<br>(1 <sup>st</sup> oldest dog) | 2                        | 3                                 | 4                        | 5<br>(5 <sup>th</sup> oldest dog) | Yes                                                 | <input type="checkbox"/> | No                      | <input type="checkbox"/> | No applicable dog | <input type="checkbox"/> |                              |                          |                          |                          |                          |                          |                   |                          |                          |                          |                          |                          |  |  |  |  |  |
|                                                                                                                                    | 1<br>(1 <sup>st</sup> oldest dog)                                                                                                                                                                                                                                                                                                                                                                                                                                                                                                                                                                                                                                                                                                                                                                                                                                                                                                                                                                                                                                                                                                                                                                                                                                      | 2                        | 3                                 | 4                        | 5<br>(5 <sup>th</sup> oldest dog) |                          |                                   |                                                     |                          |                          |                          |                          |                          |                         |                          |                          |                          |                          |                          |                   |                          |                          |                          |                          |                          |                              |                          |                          |                          |                          |                          |                   |                          |                          |                          |                          |                          |  |  |  |  |  |
| Yes                                                                                                                                | <input type="checkbox"/>                                                                                                                                                                                                                                                                                                                                                                                                                                                                                                                                                                                                                                                                                                                                                                                                                                                                                                                                                                                                                                                                                                                                                                                                                                               | <input type="checkbox"/> | <input type="checkbox"/>          | <input type="checkbox"/> | <input type="checkbox"/>          |                          |                                   |                                                     |                          |                          |                          |                          |                          |                         |                          |                          |                          |                          |                          |                   |                          |                          |                          |                          |                          |                              |                          |                          |                          |                          |                          |                   |                          |                          |                          |                          |                          |  |  |  |  |  |
| No                                                                                                                                 | <input type="checkbox"/>                                                                                                                                                                                                                                                                                                                                                                                                                                                                                                                                                                                                                                                                                                                                                                                                                                                                                                                                                                                                                                                                                                                                                                                                                                               | <input type="checkbox"/> | <input type="checkbox"/>          | <input type="checkbox"/> | <input type="checkbox"/>          |                          |                                   |                                                     |                          |                          |                          |                          |                          |                         |                          |                          |                          |                          |                          |                   |                          |                          |                          |                          |                          |                              |                          |                          |                          |                          |                          |                   |                          |                          |                          |                          |                          |  |  |  |  |  |
| No applicable dog                                                                                                                  | <input type="checkbox"/>                                                                                                                                                                                                                                                                                                                                                                                                                                                                                                                                                                                                                                                                                                                                                                                                                                                                                                                                                                                                                                                                                                                                                                                                                                               | <input type="checkbox"/> | <input type="checkbox"/>          | <input type="checkbox"/> | <input type="checkbox"/>          |                          |                                   |                                                     |                          |                          |                          |                          |                          |                         |                          |                          |                          |                          |                          |                   |                          |                          |                          |                          |                          |                              |                          |                          |                          |                          |                          |                   |                          |                          |                          |                          |                          |  |  |  |  |  |
| 10. How many people are there in your household? (Please don't include your pets; only humans)                                     | <input type="checkbox"/> 1<br><input type="checkbox"/> 2<br><input type="checkbox"/> 3<br><input type="checkbox"/> 4<br><input type="checkbox"/> 5<br><input type="checkbox"/> 6<br><input type="checkbox"/>                                                                                                                                                                                                                                                                                                                                                                                                                                                                                                                                                                                                                                                                                                                                                                                                                                                                                                                                                                                                                                                           |                          |                                   |                          |                                   |                          |                                   |                                                     |                          |                          |                          |                          |                          |                         |                          |                          |                          |                          |                          |                   |                          |                          |                          |                          |                          |                              |                          |                          |                          |                          |                          |                   |                          |                          |                          |                          |                          |  |  |  |  |  |
| 11. Where do you live?<br>*Urban areas are considered to be the 23 wards of Tokyo and ordinance-designated cities (where "ward" is | <input type="checkbox"/> Urban<br><input type="checkbox"/> Rural                                                                                                                                                                                                                                                                                                                                                                                                                                                                                                                                                                                                                                                                                                                                                                                                                                                                                                                                                                                                                                                                                                                                                                                                       |                          |                                   |                          |                                   |                          |                                   |                                                     |                          |                          |                          |                          |                          |                         |                          |                          |                          |                          |                          |                   |                          |                          |                          |                          |                          |                              |                          |                          |                          |                          |                          |                   |                          |                          |                          |                          |                          |  |  |  |  |  |

|                                                                                                                                                                                     |                                                                                                                                                                  |
|-------------------------------------------------------------------------------------------------------------------------------------------------------------------------------------|------------------------------------------------------------------------------------------------------------------------------------------------------------------|
| included in the address).                                                                                                                                                           |                                                                                                                                                                  |
| 12. Have you received any education related to medicine or animal health (i.e., underwent education about pathogens, pathology, and/or treatment of diseases in humans or animals)? | <input type="checkbox"/> Yes<br><input type="checkbox"/> No                                                                                                      |
| 13. Do you have a full-time position/occupation related to dogs (i.e., at a pet shop, as a breeder, or veterinarian)?                                                               | <input type="checkbox"/> Yes<br><input type="checkbox"/> No                                                                                                      |
| 14. Do you have a full-time position/occupation associated with medicine or animal health (i.e., doctor, pharmacist, nurse, or veterinarian)?                                       | <input type="checkbox"/> Yes<br><input type="checkbox"/> No                                                                                                      |
| 15. Have you ever been vaccinated against COVID-19?                                                                                                                                 | <input type="checkbox"/> Yes<br><input type="checkbox"/> No                                                                                                      |
| 16. Would you still want to receive a COVID-19 vaccine if there was a charge for it?                                                                                                | <input type="checkbox"/> Yes<br><input type="checkbox"/> No                                                                                                      |
| 17. How often do you get vaccinated against influenza?                                                                                                                              | <input type="checkbox"/> Every year<br><input type="checkbox"/> Every few years<br><input type="checkbox"/> Never                                                |
| 18. Do you intend to get an influenza vaccination in the future?                                                                                                                    | <input type="checkbox"/> Yes<br><input type="checkbox"/> No                                                                                                      |
| 19. How do you think about the dogs that you own?                                                                                                                                   | <input type="checkbox"/> As a member of the family<br><input type="checkbox"/> As a familiar animal-like family<br><input type="checkbox"/> As a familiar animal |
| 20. Do you interact with other dog owners in                                                                                                                                        | <input type="checkbox"/> Yes<br><input type="checkbox"/> No                                                                                                      |

|                                                                                                                                       |                                                                                                                                                                                                    |
|---------------------------------------------------------------------------------------------------------------------------------------|----------------------------------------------------------------------------------------------------------------------------------------------------------------------------------------------------|
| your neighborhood (i.e., talking to other dog owners when walking your dog)?                                                          |                                                                                                                                                                                                    |
| 21. How often do you interact with other dog owners in your neighborhood?<br>(Only for those who answered Yes to Q20)                 | <input type="checkbox"/> Once a week<br><input type="checkbox"/> Once a month<br><input type="checkbox"/> Once every six months to a year<br><input type="checkbox"/> Once every several years     |
| 22. Have you ever joined a community of dog lovers?                                                                                   | <input type="checkbox"/> Yes<br><input type="checkbox"/> No                                                                                                                                        |
| 23. Do you have a family veterinary clinic where you consult about your dog's health?                                                 | <input type="checkbox"/> Yes<br><input type="checkbox"/> No                                                                                                                                        |
| 24. How often do you visit a veterinary clinic?                                                                                       | <input type="checkbox"/> Once a week<br><input type="checkbox"/> Once a month<br><input type="checkbox"/> Once every six months to a year<br><input type="checkbox"/> Once every several years     |
| 25. Has a veterinarian ever advised you about vaccinating your dog against rabies?                                                    | <input type="checkbox"/> Recommended vaccinating your dog against rabies<br><input type="checkbox"/> Recommended not vaccinating your dog against rabies<br><input type="checkbox"/> No experience |
| 26. Are you aware that dog rabies vaccination is compulsory every year?                                                               | <input type="checkbox"/> Yes<br><input type="checkbox"/> No                                                                                                                                        |
| 27. Are you aware that there is an annual mass rabies vaccination opportunity from April to June organized by the local municipality? | <input type="checkbox"/> Yes<br><input type="checkbox"/> No                                                                                                                                        |
| 28. Do you feel that rabies vaccination is expensive?                                                                                 | <input type="checkbox"/> Expensive<br><input type="checkbox"/> Not expensive                                                                                                                       |
